# Supplementary material
Source: PubMed Central journal article supplement (PMC1334662)
Supplement: pnas_0509690103_1.pdf [file pnas_0509690103_1.pdf]

|              |                                 |       |
|--------------|---------------------------------|-------|
| <i>ompC3</i> | AGTTTTAGTATCATATTC              | 12/18 |
| <i>chxR2</i> | TGTTTG <u>GTTTTAGAA</u> TATTTTG |       |
| <i>ompF1</i> | ACTTTTG <u>GTTAC</u> ATATTT     | 11/18 |
| <i>ompF2</i> | TC <u>TTTTTGAAAC</u> AAATC      |       |
| <i>infA</i>  | TATTGGGTTTTTGCTTGTAACAAATTAA    | 9/18  |
