# Supplementary material
Source: PubMed Central journal article supplement (PMC1334662)
Supplement: pnas_0509690103_2.pdf [file pnas_0509690103_2.pdf]

|             | 10 |   |   |   |   |   |   |   |   |   | 20 |   |   |   |   |   |   |   |   |   | 30 |   |   |   |   |   |   |   |   |   | 40 |   |   |   |   |   |   |   |   |   | 50 |   |   |   |   |   |   |   |   |   |
|-------------|----|---|---|---|---|---|---|---|---|---|----|---|---|---|---|---|---|---|---|---|----|---|---|---|---|---|---|---|---|---|----|---|---|---|---|---|---|---|---|---|----|---|---|---|---|---|---|---|---|---|
| Ec OmpR     | M  | Q | E | N | Y | K | I | L | V | V | D  | D | D | M | R | L | R | A | L | L | E  | R | Y | L | T | E | Q | G | F | Q | V  | R | S | V | A | N | A | E | Q | M | D  | R | L | L | T | R | E | - | S | F |
| Ec CpxR     | M  | - | - | N | K | I | L | L | V | - | D  | D | D | R | E | L | - | T | S | L | L  | K | E | L | L | E | M | E | G | F | N  | V | I | V | A | H | D | G | E | Q | A  | L | D | L | L | D | D | - | S | I |
| Amoeba ChoR | M  | Q | K | T | K | I | L | L | I | - | E  | D | E | E | D | I | A | S | L | I | K  | L | Q | A | E | L | A | G | Y | K | V  | H | L | E | M | D | G | L | N | G | F  | L | A | I | E | R | E | - | K | P |
| CPn ChoR    | M  | I | G | D | K | I | I | L | F | V | T  | E | D | - | - | - | - | L | S | L | S  | S | Q | L | K | D | L | A | S | Q | R  | S | D | Y | Q | I | L | V | S | P | V  | F | P | T | S | F | E | - | S | - |
| GPIC ChoR   | M  | L | T | D | K | I | I | L | F | V | T  | E | D | - | - | - | - | S | N | I | S  | L | Q | L | K | E | F | A | - | Q | N  | V | E | Y | K | I | I | V | A | S | A  | L | T | S | T | S | E | - | - | A |
| MoPn ChoR   | M  | A | G | P | K | H | V | L | L | V | S  | E | N | - | - | - | - | W | D | L | F  | F | Q | T | K | K | L | L | N | P | E  | - | E | Y | R | C | T | I | G | Q | Q  | Y | K | Q | - | - | E | V | S | A |
| CT ChoR     | M  | A | G | P | K | H | V | L | L | V | S  | E | N | - | - | - | - | W | D | L | F  | F | Q | T | K | E | L | L | N | P | E  | - | E | Y | R | C | T | I | G | Q | Q  | Y | K | Q | - | - | E | L | S | A |

|             | 60 |   |   |   |   |   |   |   |   |   | 70 |   |   |   |   |   |   |   |   |   | 80 |   |   |   |   |   |   |   |   |   | 90 |   |   |   |   |   |   |   |   |   | 100 |   |   |   |   |   |   |   |   |   |
|-------------|----|---|---|---|---|---|---|---|---|---|----|---|---|---|---|---|---|---|---|---|----|---|---|---|---|---|---|---|---|---|----|---|---|---|---|---|---|---|---|---|-----|---|---|---|---|---|---|---|---|---|
| Ec OmpR     | H  | L | M | V | L | D | L | M | L | - | P  | G | E | D | G | L | S | I | C | R | R  | L | R | S | Q | S | N | P | - | - | M  | P | I | I | M | V | T | A | K | G | E   | E | V | D | R | I | V | G | L | E |
| Ec CpxR     | D  | L | L | L | L | D | V | M | M | - | P  | K | K | N | G | - | - | - | I | D | T  | L | K | A | L | R | Q | T | H | Q | T  | P | V | I | M | L | T | A | R | G | S   | E | L | D | R | V | L | G | L | E |
| Amoeba ChoR | D  | V | I | I | L | D | I | M | L | - | P  | G | L | N | G | L | D | V | C | R | K  | I | K | S | N | P | D | L | E | N | I  | P | I | I | I | I | S | A | K | S | E   | E | L | D | V | V | L | G | L | E |
| CPn ChoR    | V  | A | I | F | C | E | Y | L | L | L | P  | - | - | - | - | - | - | - | E | Q | I  | F | S | P | G | I | F | P | E | E | D  | L | I | V | L | F | D | T | F | Q | E   | E | A | I | T | K | V | L | N |   |
| GPIC ChoR   | D  | L | I | F | C | E | Y | L | L | L | P  | - | - | - | - | - | - | - | E | D | M  | F | S | N | K | I | P | S | E | T | D  | L | V | V | L | F | D | A | F | E | E   | E | A | V | V | K | I | L | N |   |
| MoPn ChoR   | D  | L | I | V | C | E | Y | E | L | L | P  | - | - | - | - | - | - | - | K | D | I  | H | A | P | K | Y | F | E | A | N | F  | V | I | V | L | L | D | V | F | D | E   | E | K | C | I | D | L | L | D |   |
| CT ChoR     | D  | L | V | V | C | E | Y | S | L | L | P  | - | - | - | - | - | - | - | R | E | V  | R | S | P | K | S | L | K | G | S | F  | V | L | V | L | L | D | F | F | D | E   | E | T | S | V | D | L | L | D |   |
